# Supplementary material for: Urine power cell with ammonium-intercalating electrodes: A novel approach to urine valorization coupled with CO2 capture
Source: Research Square preprint supplement (doi:10.21203/rs.3.rs-7003532/v1), 2025-07-08
Supplement: Supplementary file 1 [file 823b7f8ce0dd16d4205829f0.pdf]

## Supporting Information

### Urine power cell with ammonium-intercalating electrodes: a novel approach to urine valorization coupled with CO<sub>2</sub> capture

Hanwoong Kim<sup>a</sup>, Woohyuk Shin<sup>a</sup>, Moon Son<sup>b, c, \*</sup>, Changsoo Lee<sup>a, d, \*</sup>

<sup>a</sup> Department of Civil, Urban, Earth, and Environmental Engineering, Ulsan National Institute of Science and Technology (UNIST), 50 UNIST-gil, Eonyang-eup, Ulju-gun, Ulsan 44919, Republic of Korea

<sup>b</sup> Center for Water Cycle Research, Korea Institute of Science and Technology, 5 Hwarang-ro 14-gil, Seongbuk-gu, Seoul, 02792, Republic of Korea

<sup>c</sup> Division of Energy and Environment Technology, KIST-School, University of Science and Technology, Seoul, 02792, Republic of Korea

<sup>d</sup> Graduate School of Carbon Neutrality, Ulsan National Institute of Science and Technology (UNIST), 50 UNIST-gil, Eonyang-eup, Ulju-gun, Ulsan 44919, Republic of Korea

\* Corresponding authors: M. Son (moonson@kist.re.kr); C. Lee (cslee@unist.ac.kr)

**Number of pages: 13**

**Number of tables: 3**

**Number of figures: 9**

**Table S1** Composition of synthetic hydrolyzed urine.

|                                          | Typical concentration (g L <sup>-1</sup> ) | Molar concentration (mM) |
|------------------------------------------|--------------------------------------------|--------------------------|
| <b><i>Formulation</i></b>                |                                            |                          |
| Na <sub>2</sub> SO <sub>4</sub>          | 2.3                                        | 8.1                      |
| NaH <sub>2</sub> PO <sub>4</sub>         | 2.1                                        | 17.5                     |
| NaCl                                     | 3.6                                        | 61.6                     |
| KCl                                      | 4.2                                        | 56.3                     |
| NH <sub>4</sub> CH <sub>3</sub> COO      | 9.6                                        | 124.6                    |
| NH <sub>4</sub> HCO <sub>3</sub>         | 21.4                                       | 270.9                    |
| NH <sub>4</sub> OH (25%, w/w)            | 13 mL L <sup>-1</sup> <sup>a</sup>         |                          |
| <b><i>Physicochemical properties</i></b> |                                            |                          |
| Total ammonia nitrogen                   | 7.8                                        | 559.9                    |
| Total inorganic carbon                   | 3.3                                        | 270.9                    |
| Total organic carbon                     | 1.5                                        | 124.6                    |
| Na <sup>+</sup>                          | 2.6                                        | 111.5                    |
| K <sup>+</sup>                           | 2.2                                        | 56.3                     |
| Cl <sup>-</sup>                          | 4.2                                        | 117.9                    |
| PO <sub>4</sub> <sup>3-</sup>            | 1.7                                        | 17.5                     |
| SO <sub>4</sub> <sup>2-</sup>            | 1.6                                        | 16.2                     |

<sup>a</sup> NH<sub>4</sub>OH was added by volume (mL L<sup>-1</sup>).

**Table S2** Physicochemical properties of hydrolyzed urine and of spent urine after CO<sub>2</sub> absorption.

| Parameter                     | Unit                | Hydrolyzed urine | Spent urine |
|-------------------------------|---------------------|------------------|-------------|
| pH                            |                     | 9.0 ± 0.0        | 7.6 ± 0.3   |
| Conductivity                  | mS cm <sup>-1</sup> | 38.7 ± 0.7       | 51.9 ± 0.5  |
| Total ammonia nitrogen        | g L <sup>-1</sup>   | 8.0 ± 0.0        | 7.9 ± 0.0   |
| Total inorganic carbon        | g L <sup>-1</sup>   | 2.5 ± 0.0        | 4.4 ± 0.1   |
| Na <sup>+</sup>               | g L <sup>-1</sup>   | 2.5 ± 0.0        | 2.6 ± 0.0   |
| K <sup>+</sup>                | g L <sup>-1</sup>   | 2.4 ± 0.0        | 2.4 ± 0.0   |
| Cl <sup>-</sup>               | g L <sup>-1</sup>   | 4.4 ± 0.0        | 4.2 ± 0.1   |
| PO <sub>4</sub> <sup>3-</sup> | g L <sup>-1</sup>   | 1.6 ± 0.1        | 1.4 ± 0.1   |
| SO <sub>4</sub> <sup>2-</sup> | g L <sup>-1</sup>   | 1.7 ± 0.0        | 1.4 ± 0.0   |

**Table S3** Performance of urine-ammonium power cells operated with diluted spent urine (SU) as high-salinity stream and freshwater ( $1 \text{ g L}^{-1} \text{ NaCl}$ ) as low-salinity stream. Each condition was tested for at least three full cycles for each condition.

| Dilution factor | Average PD ( $\text{W m}^{-2}$ ) | Cycle time (s) | Consumed SU (mL) <sup>a</sup> | Energy recovery (J) | Specific energy recovery ( $\text{kJ m}^{-3}$ ) <sup>b</sup> |
|-----------------|----------------------------------|----------------|-------------------------------|---------------------|--------------------------------------------------------------|
| Undiluted       | $0.27 \pm 0.02$                  | $2002 \pm 74$  | $500 \pm 18$                  | $0.38 \pm 0.03$     | $0.8 \pm 0.1$                                                |
| 2-fold          | $0.23 \pm 0.01$                  | $1687 \pm 44$  | $211 \pm 5$                   | $0.27 \pm 0.02$     | $1.3 \pm 0.1$                                                |
| 10-fold         | $0.11 \pm 0.01$                  | $1407 \pm 54$  | $35 \pm 1$                    | $0.11 \pm 0.01$     | $3.1 \pm 0.2$                                                |

PD, power density.

<sup>a</sup> Expressed as the equivalent volume of undiluted SU consumed.

<sup>b</sup> Calculated per unit volume of equivalent undiluted SU consumed.

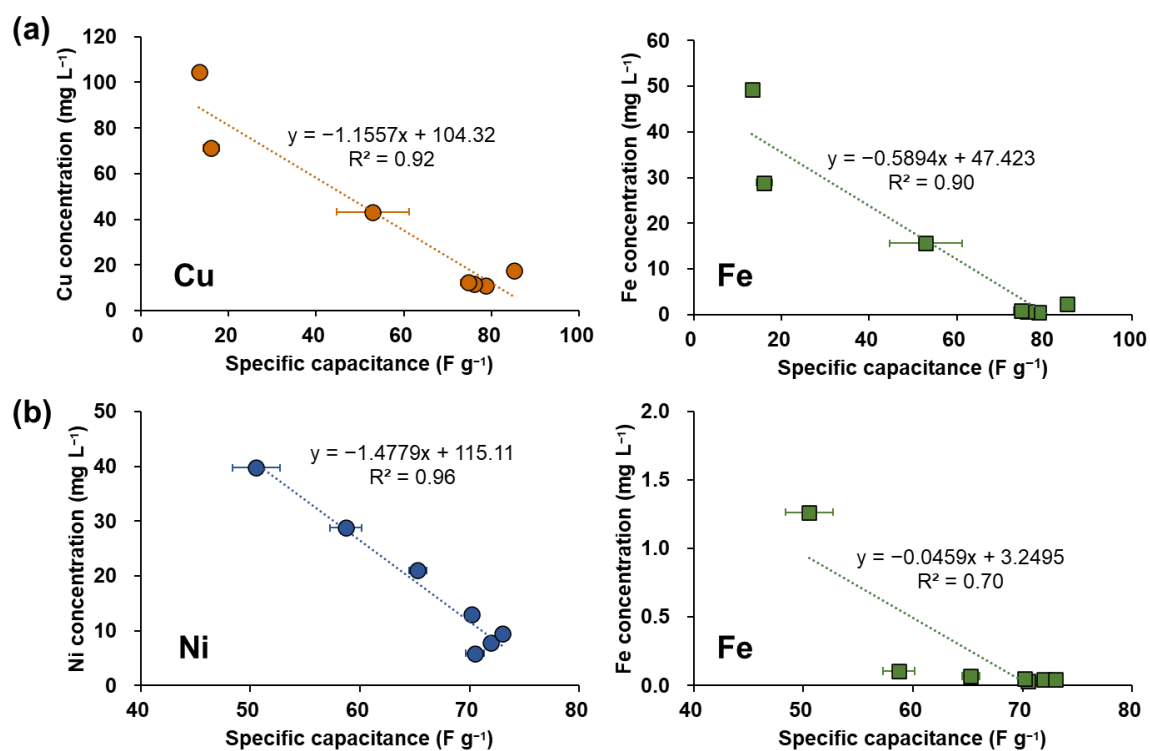

**Fig. S1** Correlation between leached metal concentrations and specific capacitance from stability tests of (a) CuHCF and (b) NiHCF electrodes in 560 mM NH<sub>4</sub>Cl solution across a pH range of 6.7 to 9.7. Initial measurements at pH 4.9 were excluded to avoid interference from residual surface metals originating from electrode synthesis.

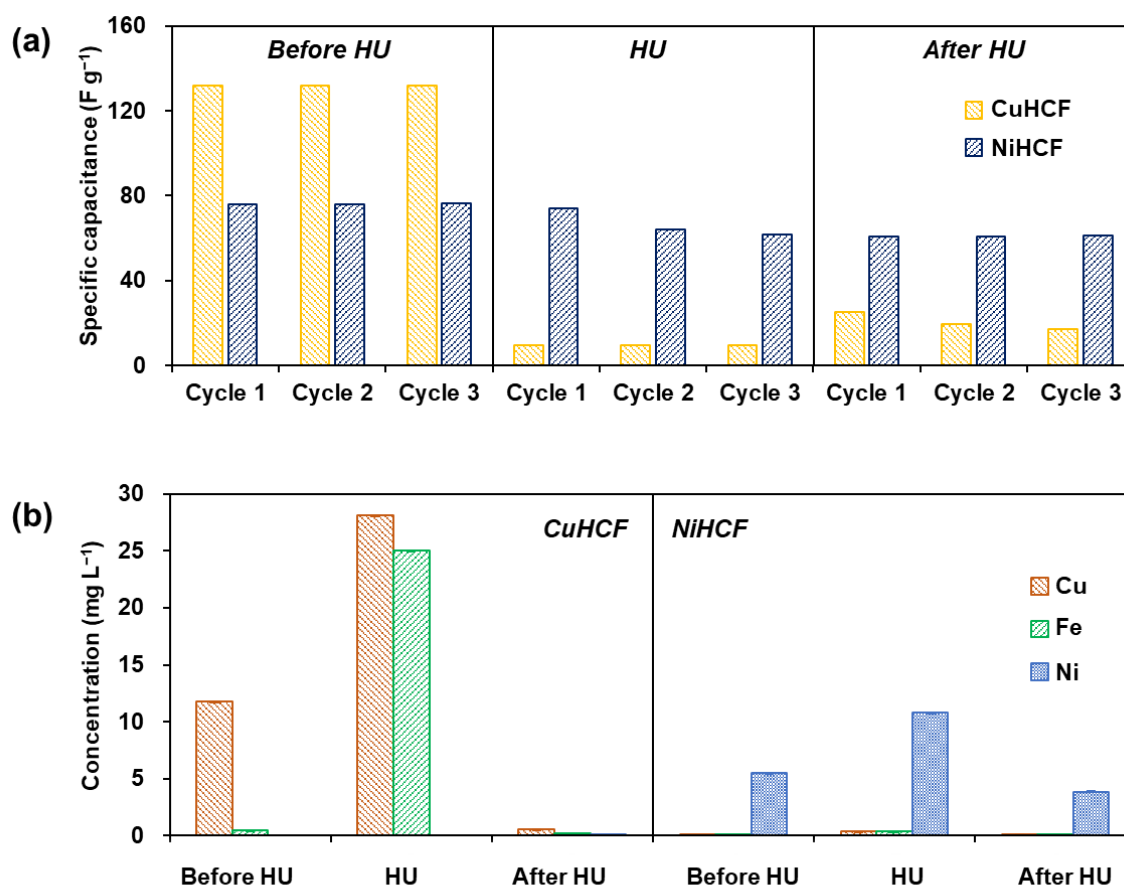

**Fig. S2** Functional and structural degradation of CuHCF and NiHCF electrodes during stability tests in hydrolyzed urine (HU), conducted using cyclic voltammetry (CV): (a) specific capacitance values and (b) leached metal concentrations measured in each CV cycle. Additional CV measurements were carried out in 560 mM  $NH_4Cl$  solution (pH 4.9) both before and after HU exposure to assess baseline and post-exposure behavior. Three CV cycles were recorded for each condition.

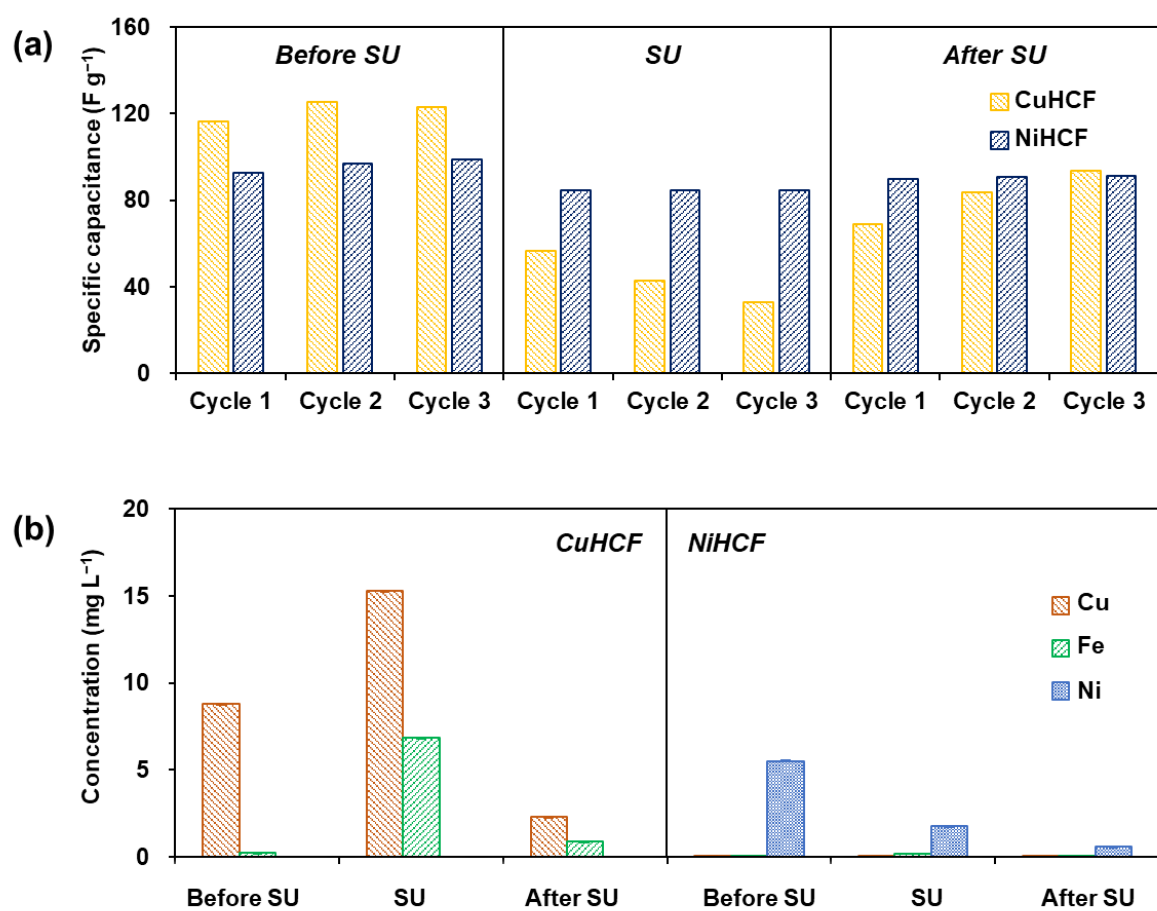

**Fig. S3** Functional and structural degradation of CuHCF and NiHCF electrodes during stability tests in spent urine (SU), conducted using cyclic voltammetry (CV): (a) specific capacitance values and (b) leached metal concentrations measured in each CV cycle. Additional CV measurements were carried out in 560 mM NH<sub>4</sub>Cl solution (pH 4.9) both before and after SU exposure to assess baseline and post-exposure behavior. Three CV cycles were recorded for each condition.

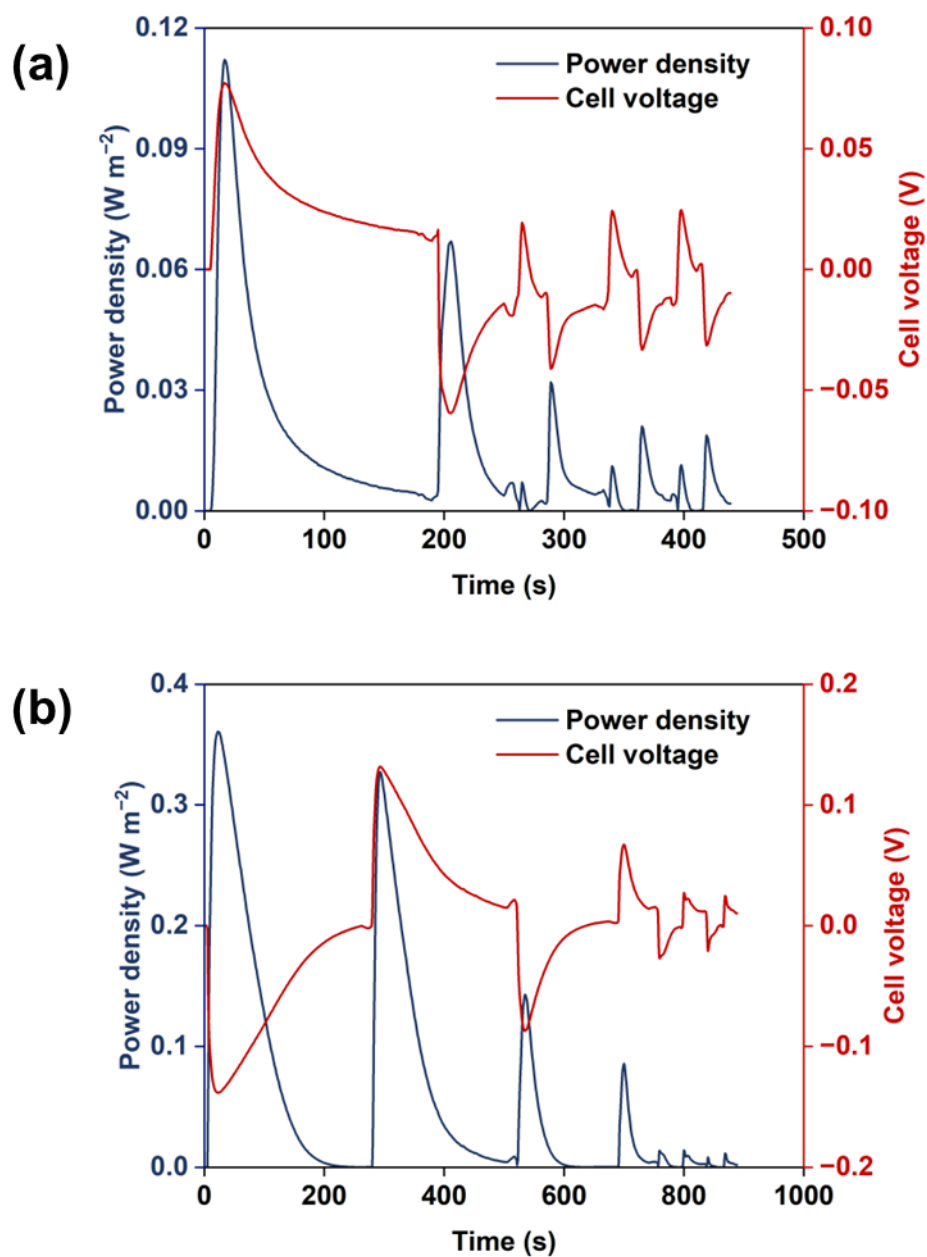

**Fig. S4** Power density and cell voltage profiles of urine-ammonium power cell equipped with CuHCF electrodes, operated at an external resistance of 75  $\Omega$  using (a) hydrolyzed urine and (b) spent urine as low-salinity streams, with freshwater (1 g L<sup>-1</sup> NaCl) as high-salinity stream.



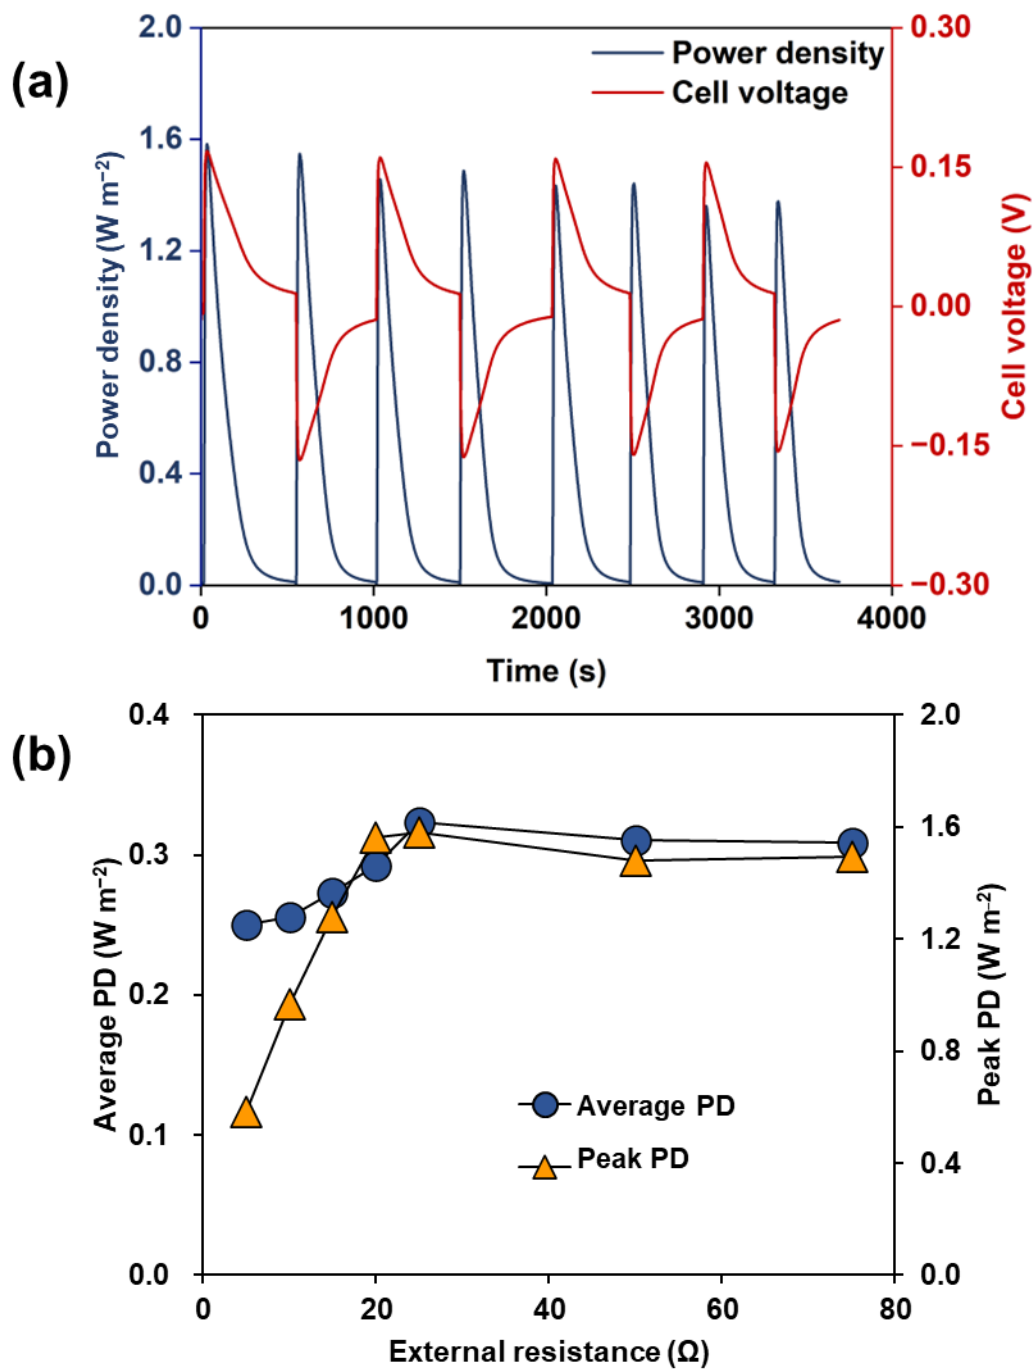

**Fig. S5** Power generation performance of urine-ammonium power cell equipped with CuHCF electrodes, operated using 560 mM  $\text{NH}_4\text{Cl}$  solution (pH 4.9) and freshwater ( $1 \text{ g L}^{-1} \text{ NaCl}$ ) as high- and low-salinity streams, respectively: (a) power density (PD) and cell voltage profiles at an external resistance of  $25 \Omega$  and (b) average and peak PD profiles as a function of external resistance.

**(a) CuHCF**

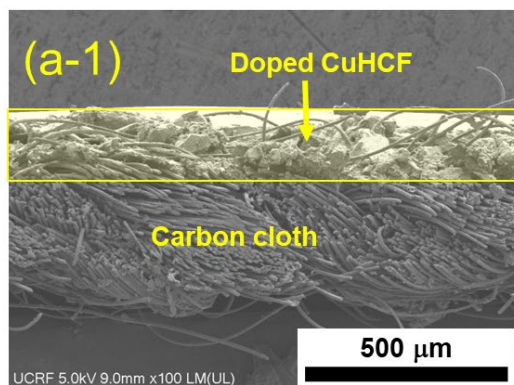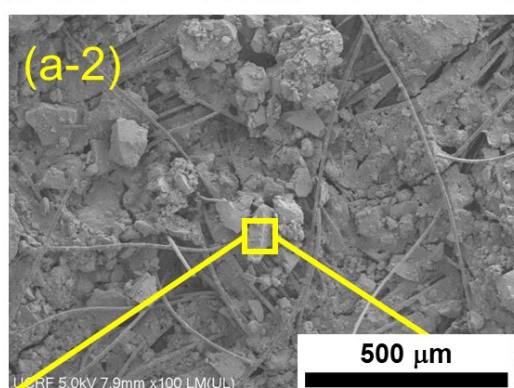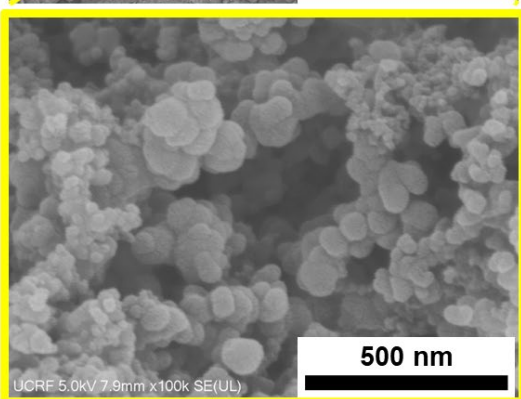

**(b) NiHCF**

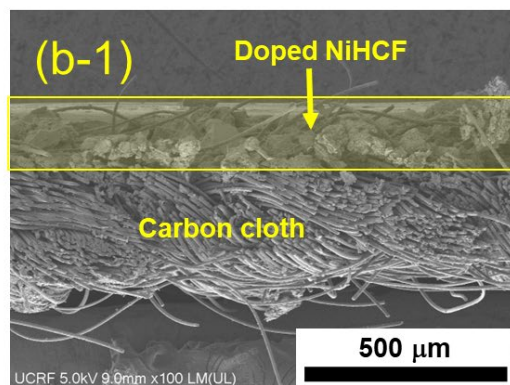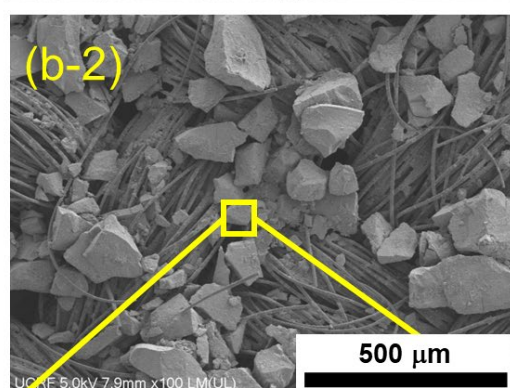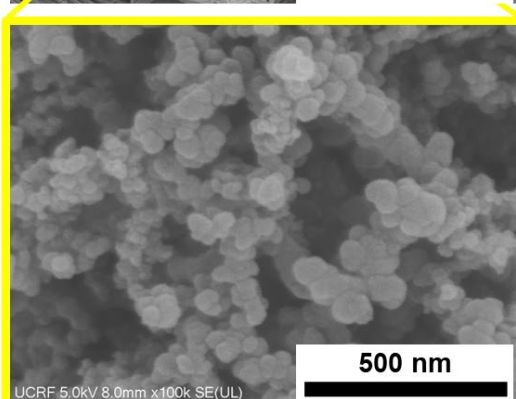

**Fig. S6** Scanning electron microscopic images of (a) CuHCF and (b) NiHCF electrodes: (a-1, b-1) cross-sectional views and (a-2, b-2) surface views.

**(a) CuHCF**

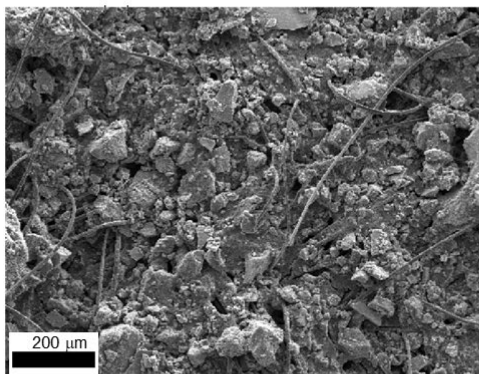

**(b) NiHCF**

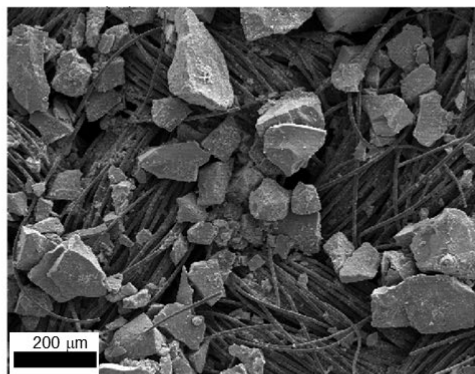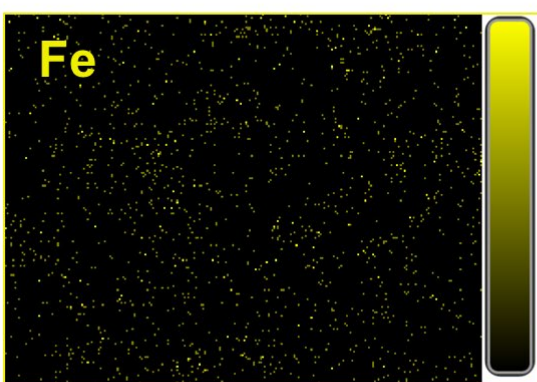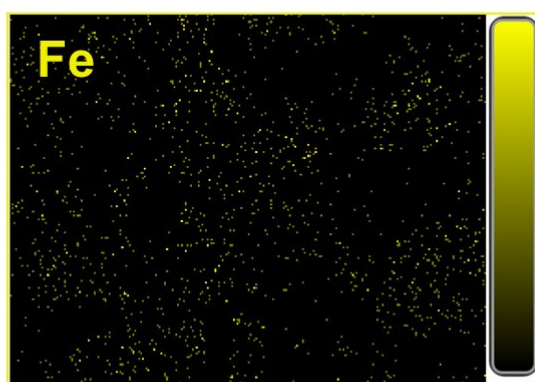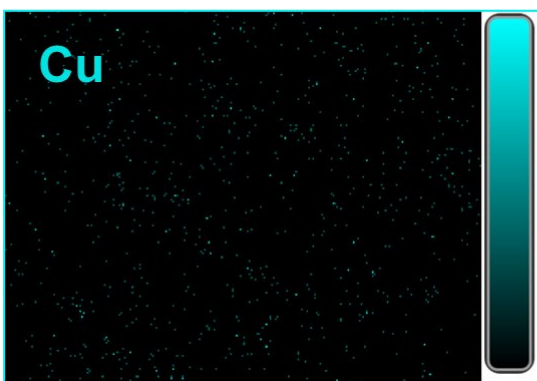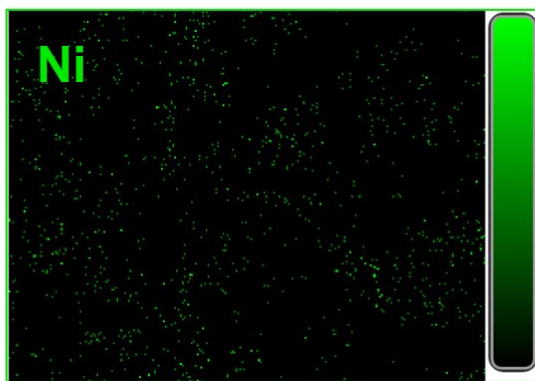

**Fig. S7** Surface elemental distributions of (a) CuHCF and (b) NiHCF electrodes characterized by energy-dispersive X-ray spectroscopy.

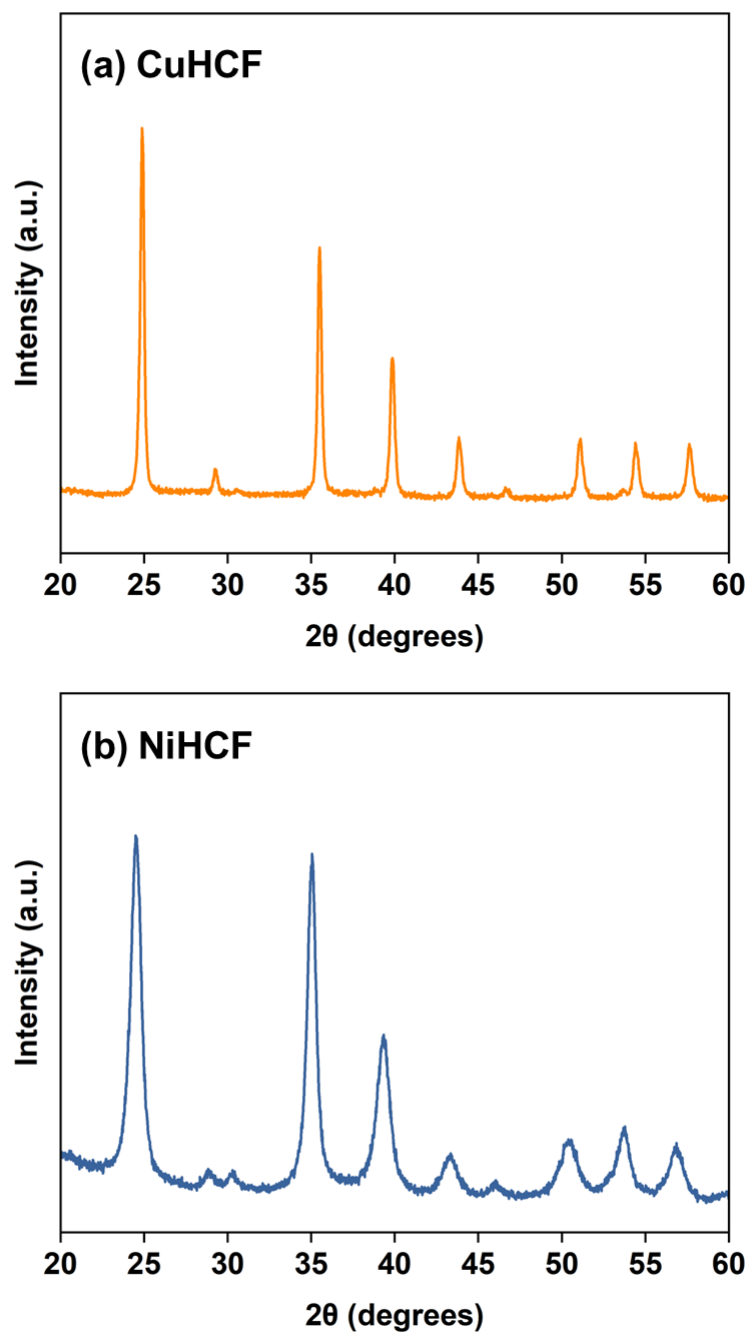

**Fig. S8** X-ray diffraction patterns of synthesized (a) CuHCF and (b) NiHCF powders, confirming their crystalline characteristics.



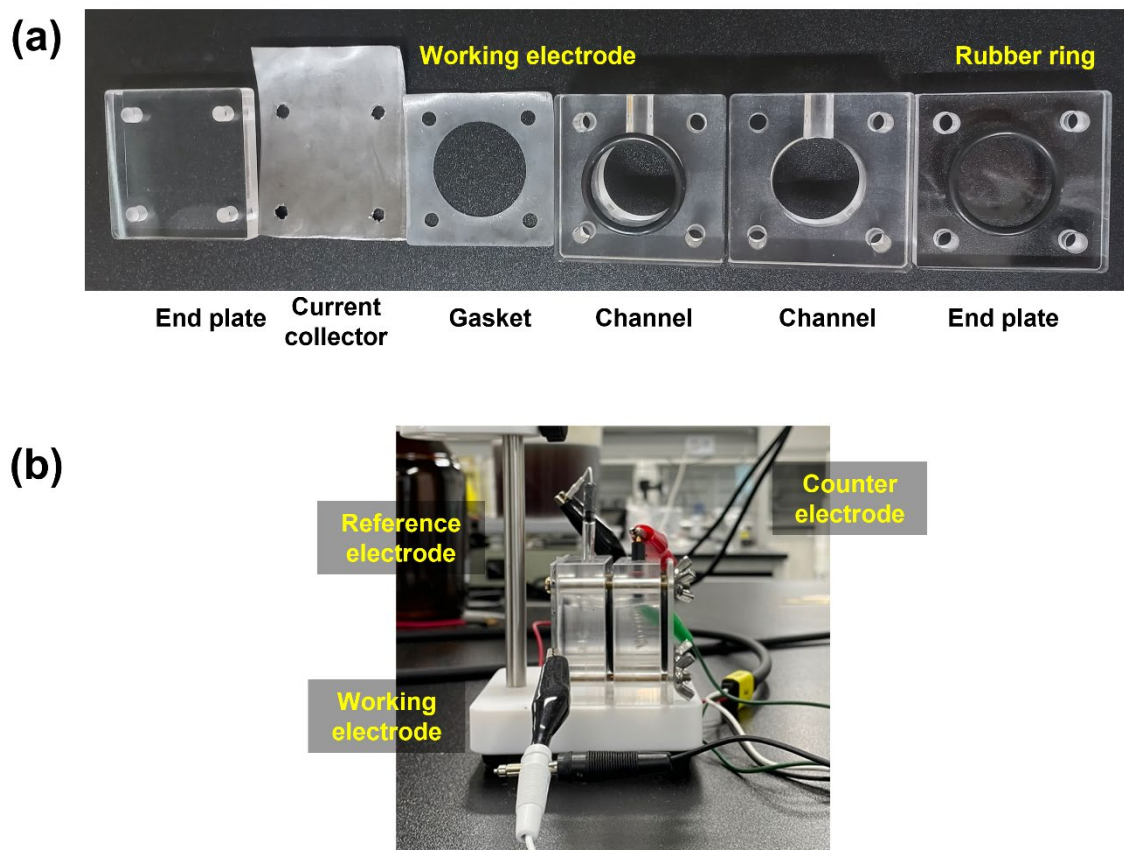

**Fig. S9** Configuration of cyclic voltammetry cell: (a) photograph of disassembled components and (b) photograph of assembled three-electrode setup.
